# Supplementary material for: Ligilactobacillus acidipiscis YJ5 modulates the gut microbiota and produces beneficial metabolites to relieve constipation by enhancing the mucosal barrier
Source: Royal Society of Chemistry journal article supplement (doi:10.1039/d3fo03259k), 2023-11-29
Supplement: d3fo03259k1.pdf [file d3fo03259k1.pdf]

## Supplementary

**Table. S1** Sequences of primers used in the study.

| Genes            | Forward primer (5'-3')  | Reverse primer (5'-3')  |
|------------------|-------------------------|-------------------------|
| <i>GAPDH</i>     | AGGTCGGTGTGAACGGATTTG   | TGTAGACCATGTAGTTGAGGTCA |
| <i>AQP4</i>      | CTTTCTGGAAGGCAGTCTCAG   | CCACACCGAGCAAAACAAAGAT  |
| <i>AQP8</i>      | TGTGTAGTATGGACCTACCTGAG | ACCGATAGACATCCGATGAAGAT |
| <i>Muc2</i>      | ATGCCACCTCCTCAAAGAC     | GTAGTTTCCGTTGGAACAGTGAA |
| <i>Muc3</i>      | GCCGTGAATTGTATGAACGGA   | CGCAGTTGACCACGTTGACTA   |
| <i>Claudin-1</i> | GGGGACAACATCGTGACCG     | AGGAGTCGAAGACTTTGCACT   |
| <i>Occludin</i>  | TTGAAAGTCCACCTCCTTACAGA | CCGGATAAAAAGAGTACGCTGG  |
| <i>Zo-1</i>      | ACCACCAACCCGAGAAGAC     | CAGGAGTCATGGACGCACA     |
| <i>c-Kit</i>     | GCCACGTCTCAGCCATCTG     | GTCGCCAGCTTCAACTATTAACT |
| <i>SCF</i>       | AAACTGGTGGCGAATC        | CACGGGTAGCAAGAAC        |

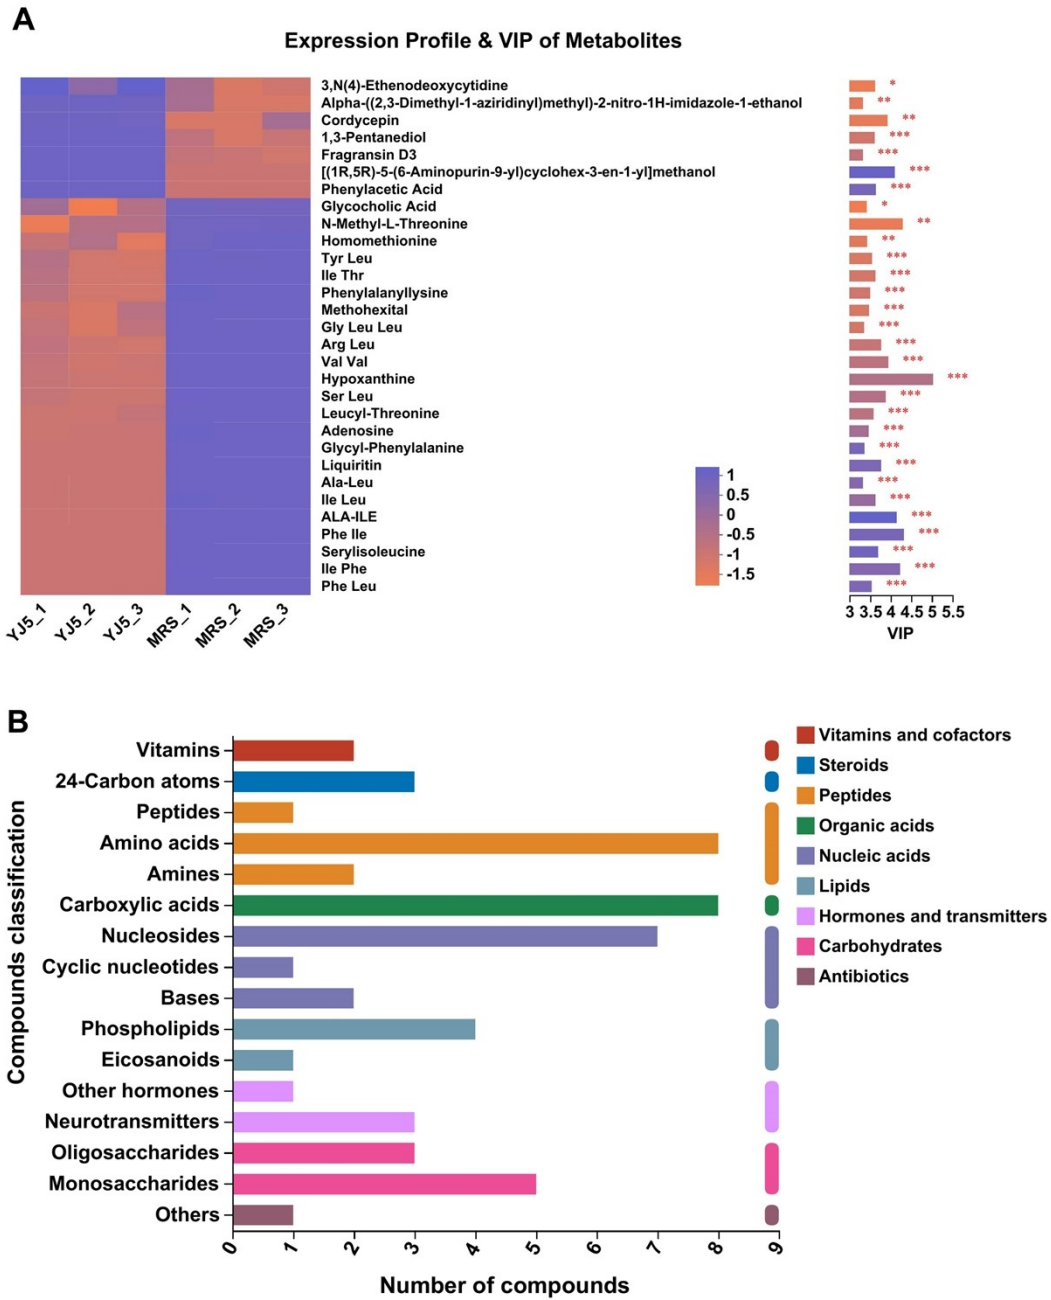

**Fig. S1** VIP metabolites and classification of differential metabolites identified in the comparison between YJ5CFS and MRS group. (A) Expression profile and VIP metabolites of YJ5CFS and MRS, (B) Compounds classification of differential metabolites identified in the comparison between YJ5CFS and MRS group.

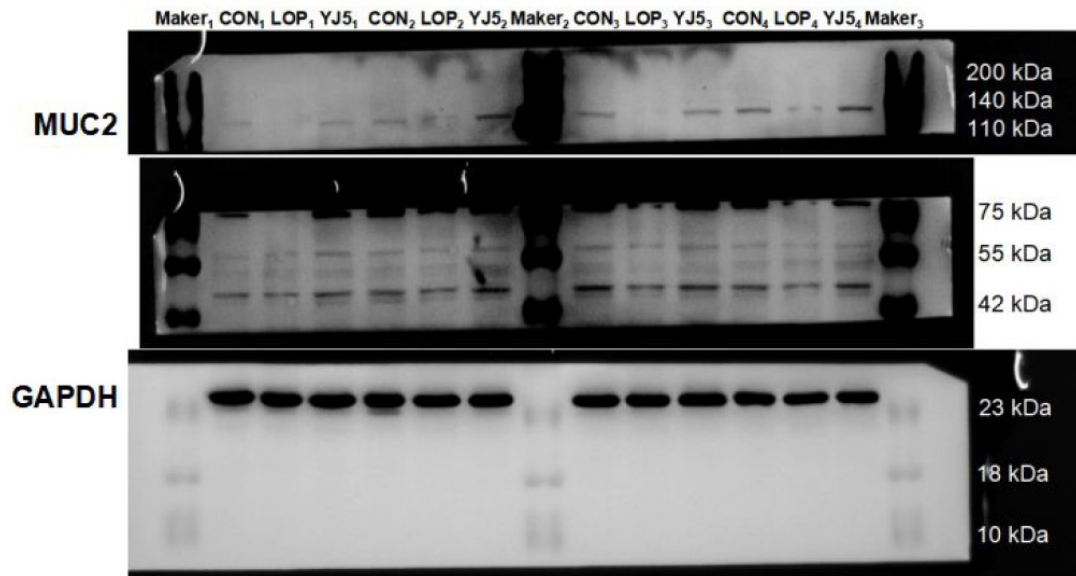

**Fig.S2** Raw Western Blots
